# Supplementary material for: Protective Effect of Hydroxysafflor Yellow A on Nephropathy by Attenuating Oxidative Stress and Inhibiting Apoptosis in Induced Type 2 Diabetes in Rat
Source: Hindawi journal article supplement (doi:10.1155/2020/7805393), 2020-03-12
Supplement: f1 [file 7805393.f1.pdf]

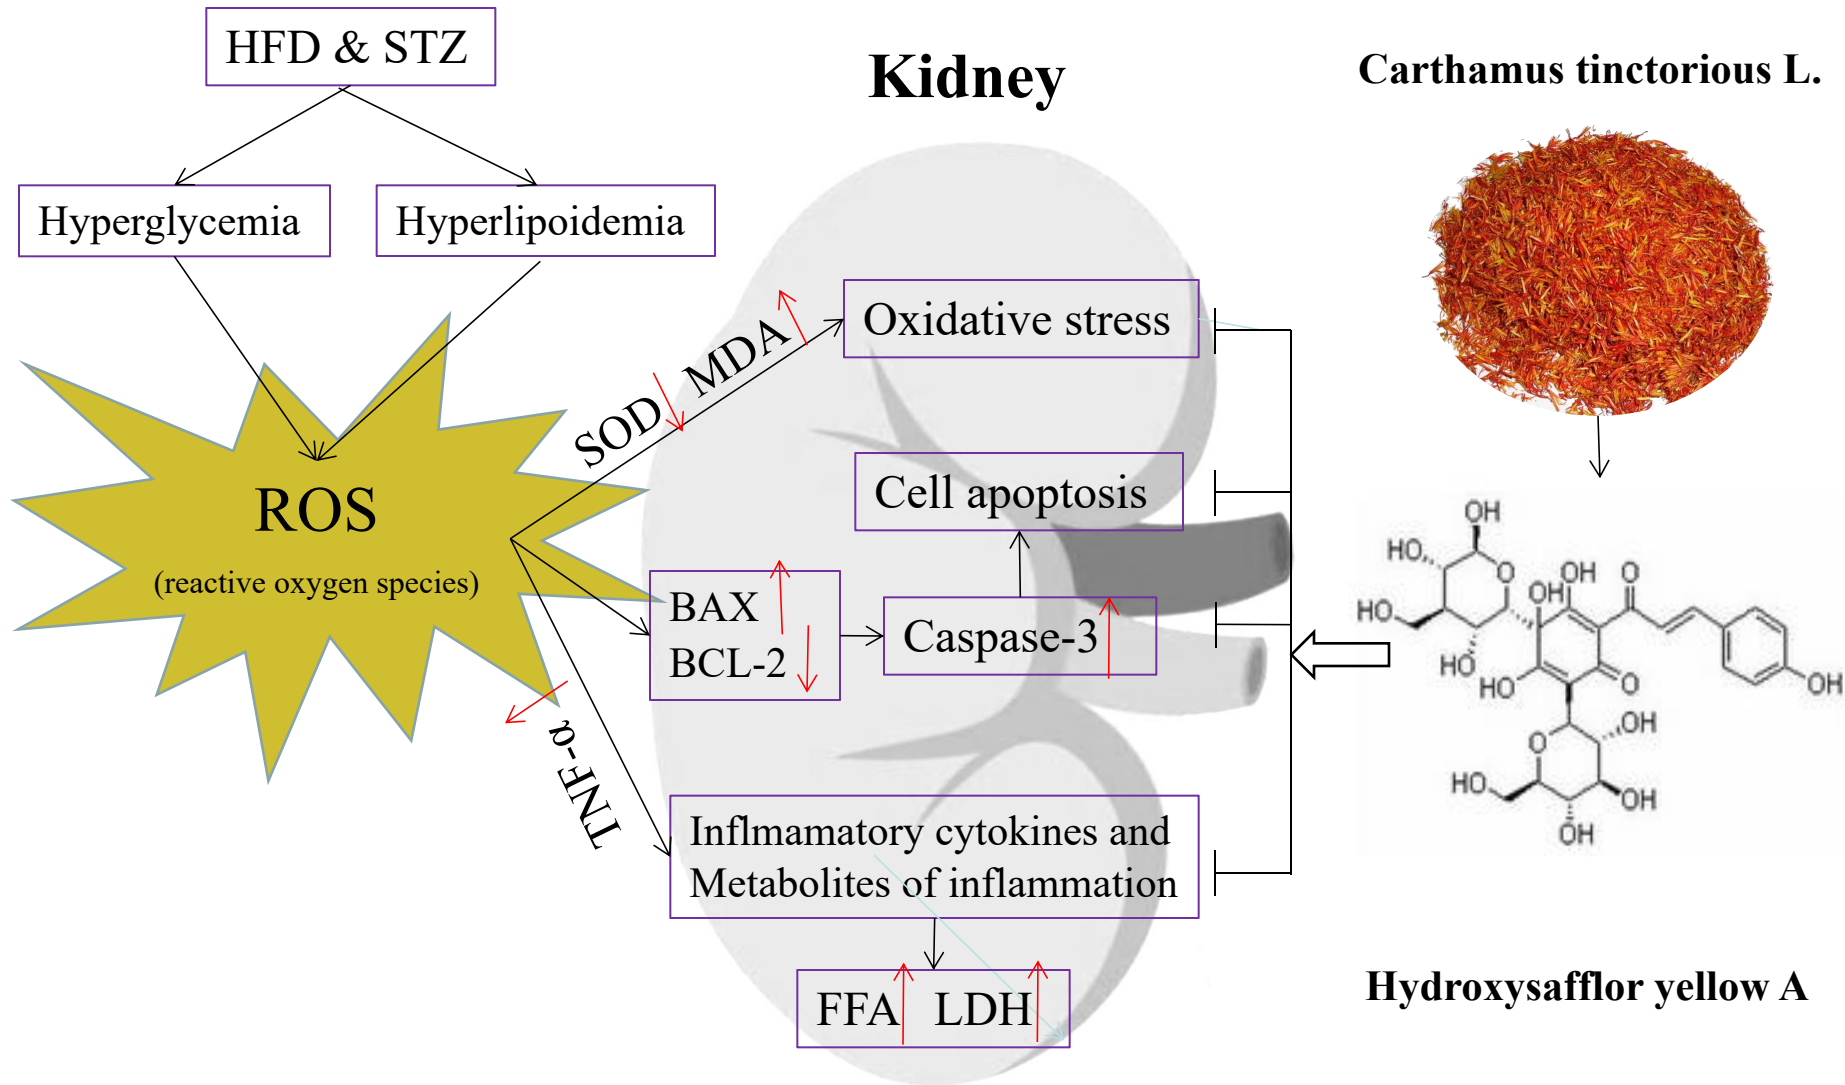

# Diabetic nephropathy
